# Supplementary material
Source: publisher figshare collection journal article supplement (https://sage.figshare.com/ndownloader/files/15312491)
Supplement: Supplementary file 1 [file 15312491]

## Supplementary files

### Appendix A

#### Example of Search Strategy from OVID-Medline

1. ((telerehabilitation.mp. or Telemedicine/ or Telerehabilitation/ or Videoconferencing/ or Remote Consultation/) adj3 Traumatic brain injury.mp.) or Brain Injuries, Traumatic/
2. ((Exercise/ or accelerometry.mp. or Accelerometry/ or Physical Fitness/) adj3 Traumatic brain injury.mp.) or Brain Injuries, Traumatic/
3. (Synchronous supervision and Traumatic brain injury).mp. or Brain Injuries, Traumatic/ [mp=title, abstract, original title, name of substance word, subject heading word, keyword heading word, protocol supplementary concept word, rare disease supplementary concept word, unique identifier, synonyms]
4. (Asynchronous supervision and Traumatic brain injury).mp. or Brain Injuries, Traumatic/ [mp=title, abstract, original title, name of substance word, subject heading word, keyword heading word, protocol supplementary concept word, rare disease supplementary concept word, unique identifier, synonyms]
5. (mobile health.mp. or Telemedicine/) adj3 (Traumatic brain injury.mp. or Brain Injuries, Traumatic/)
6. Computer-Assisted Instruction/ or Telemedicine/ or asynchronous delivery.mp.
7. 5 and 6
8. 1 or 2 or 3 or 4 or 5 or 6
9. (physical therapy or physiotherapy or physical interventions).mp. [mp=title, abstract, original title, name of substance word, subject heading word, keyword heading word, protocol supplementary concept word, rare disease supplementary concept word, unique identifier, synonyms]
10. 8 and 9

#### Example of Search Strategy from CINAHL

- #1 telerehabilitation.mp. or Telemedicine/ or Telerehabilitation/ or Videoconferencing/ or Remote Consultation/
- #2 Traumatic brain injury.mp. or Brain Injuries, Traumatic/
- #3 #1 and #2
- #4 Exercise/ or accelerometry.mp. or Accelerometry/ or Physical Fitness/
- #5 #2 and #4
- #6 #3 and #4
- #7 Electronic Mail/ or Telecommunications/ or Computer Communication Networks/
- #8 #3 and #7
- #9 Synchronous delivery
- #10 #2 and #9
- #11 #1 and #9
- #12 mobile health.mp. or Telemedicine/
- #13 #2 and #12
- #14 #3 and #12
- #15 Computer-Assisted Instruction/ or Telemedicine/ or asynchronous delivery.mp.
- #16 #2 and #15

## **Appendix B**

### **Scoping Review Remote supervision extraction form** **(initially guided by Cochrane Collaboration)**

|                                                                                                                                                                   |  |
|-------------------------------------------------------------------------------------------------------------------------------------------------------------------|--|
| 1. Date form completed ( <i>dd/mm/yyyy</i> )                                                                                                                      |  |
| 2. Name/ID of person extracting data                                                                                                                              |  |
| 3. Study title                                                                                                                                                    |  |
| 4. Contact details of corresponding author                                                                                                                        |  |
| 5. Study ID ( <i>e.g. 01 plus surname of first author and year first full report of study was published e.g. Smith 2001</i> )                                     |  |
| 6. Country in which the study conducted                                                                                                                           |  |
| 7. Economic level of the country in which the study conducted ( <i>e.g. low income, lower-middle income or upper-</i><br><br><i>Rural or Urban if available</i> ) |  |
| 8. Funding sources and possible conflict of interest                                                                                                              |  |

### Inclusion criteria for eligibility

|                                 | Inclusion criteria                                                         | Comments | Page in Article |
|---------------------------------|----------------------------------------------------------------------------|----------|-----------------|
| Study type (levels of evidence) | 1, 2, 3a,b * RCT, Systematic reviews, Cohort studies, Case-control studies |          |                 |
| Participants                    | Adult Moderate and Severe TBI (18-64years old)                             |          |                 |

### Methods

|                  | Description | Page in Article |
|------------------|-------------|-----------------|
| Study objectives |             |                 |
| Sampling         |             |                 |

#### *Objective 1 and 2: Type of Remote supervision and Frequency of Remote Supervision*

| Description Type | Frequency of remote supervision | Comments | Page in Article |
|------------------|---------------------------------|----------|-----------------|
|                  |                                 |          |                 |
|                  |                                 |          |                 |

#### *Objective 3: Types of outcome measures and rehabilitation*

| Outcomes | Outcome measures | Comments (Time points measured) | Page in Article |
|----------|------------------|---------------------------------|-----------------|
|          |                  |                                 |                 |

### Supplementary files

#### Appendix A

#### Example of Search Strategy from OVID-Medline

1. ((telerehabilitation.mp. or Telemedicine/ or Telerehabilitation/ or Videoconferencing/ or Remote Consultation/) adj3 Traumatic brain injury.mp.) or Brain Injuries, Traumatic/
2. ((Exercise/ or accelerometry.mp. or Accelerometry/ or Physical Fitness/) adj3 Traumatic brain injury.mp.) or Brain Injuries, Traumatic/

3. (Synchronous supervision and Traumatic brain injury).mp. or Brain Injuries, Traumatic/  
[mp=title, abstract, original title, name of substance word, subject heading word, keyword  
heading word, protocol supplementary concept word, rare disease supplementary concept word,  
unique identifier, synonyms]
4. (Asynchronous supervision and Traumatic brain injury).mp. or Brain Injuries, Traumatic/  
[mp=title, abstract, original title, name of substance word, subject heading word, keyword  
heading word, protocol supplementary concept word, rare disease supplementary concept word,  
unique identifier, synonyms]
5. (mobile health.mp. or Telemedicine/) adj3 (Traumatic brain injury.mp. or Brain Injuries,  
Traumatic/)
6. Computer-Assisted Instruction/ or Telemedicine/ or asynchronous delivery.mp.
7. 5 and 6
8. 1 or 2 or 3 or 4 or 5 or 6
9. (physical therapy or physiotherapy or physical interventions).mp. [mp=title, abstract, original  
title, name of substance word, subject heading word, keyword heading word, protocol  
supplementary concept word, rare disease supplementary concept word, unique identifier,  
synonyms]
10. 8 and 9

**Example of Search Strategy from CINAHL**

- #1 telerehabilitation.mp. or Telemedicine/ or Telerehabilitation/ or Videoconferencing/ or  
Remote Consultation/
- #2 Traumatic brain injury.mp. or Brain Injuries, Traumatic/
- #3 #1 and #2
- #4 Exercise/ or accelerometry.mp. or Accelerometry/ or Physical Fitness/
- #5 #2 and #4
- #6 #3 and #4
- #7 Electronic Mail/ or Telecommunications/ or Computer Communication Networks/
- #8 #3 and #7
- #9 Synchronous delivery
- #10 #2 and #9
- #11 #1 and #9
- #12 mobile health.mp. or Telemedicine/
- #13 #2 and #12
- #14 #3 and #12
- #15 Computer-Assisted Instruction/ or Telemedicine/ or asynchronous delivery.mp.
- #16 #2 and #15

## **Appendix B**

### **Scoping Review Remote supervision extraction form** **(initially guided by Cochrane Collaboration)**

|                                                                                                                                                                   |  |
|-------------------------------------------------------------------------------------------------------------------------------------------------------------------|--|
| 1. Date form completed ( <i>dd/mm/yyyy</i> )                                                                                                                      |  |
| 2. Name/ID of person extracting data                                                                                                                              |  |
| 3. Study title                                                                                                                                                    |  |
| 4. Contact details of corresponding author                                                                                                                        |  |
| 5. Study ID ( <i>e.g. 01 plus surname of first author and year first full report of study was published e.g. Smith 2001</i> )                                     |  |
| 6. Country in which the study conducted                                                                                                                           |  |
| 7. Economic level of the country in which the study conducted ( <i>e.g. low income, lower-middle income or upper-</i><br><br><i>Rural or Urban if available</i> ) |  |
| 8. Funding sources and possible conflict of interest                                                                                                              |  |

### Inclusion criteria for eligibility

|                                 | Inclusion criteria                                                         | Comments | Page in Article |
|---------------------------------|----------------------------------------------------------------------------|----------|-----------------|
| Study type (levels of evidence) | 1, 2, 3a,b * RCT, Systematic reviews, Cohort studies, Case-control studies |          |                 |
| Participants                    | Adult Moderate and Severe TBI (18-64years old)                             |          |                 |

### Methods

|                  | Description | Page in Article |
|------------------|-------------|-----------------|
| Study objectives |             |                 |
| Sampling         |             |                 |

#### *Objective 1 and 2: Type of Remote supervision and Frequency of Remote Supervision*

| Description Type | Frequency of remote supervision | Comments | Page in Article |
|------------------|---------------------------------|----------|-----------------|
|                  |                                 |          |                 |
|                  |                                 |          |                 |

#### *Objective 3: Types of outcome measures and rehabilitation*

| Outcomes | Outcome measures | Comments (Time points measured) | Page in Article |
|----------|------------------|---------------------------------|-----------------|
|          |                  |                                 |                 |
